# Supplementary material for: Luminescent ZnO quantum dots as an efficient sensor for free chlorine detection in water
Source: Royal Society of Chemistry journal article supplement (doi:10.1039/c5an02599k), 2016-01-01
Supplement: c5an02599k1.pdf [file c5an02599k1.pdf]

Supporting Information

**Luminescent ZnO quantum dots as efficient sensor for free chlorine detection in water**

Kulvinder Singh and S.K. Mehta\*

Department of Chemistry and Centre for Advanced Studies in Chemistry, Panjab University,  
Chandigarh 160014, India

Figures

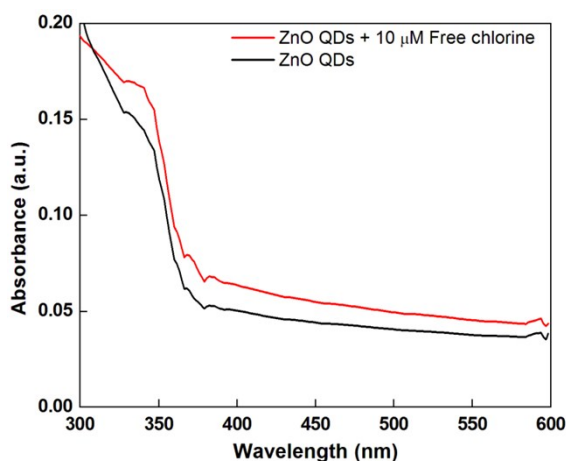

Figure S1 UV-vis spectra of ZnO QDs in presence and absence of free chlorine.

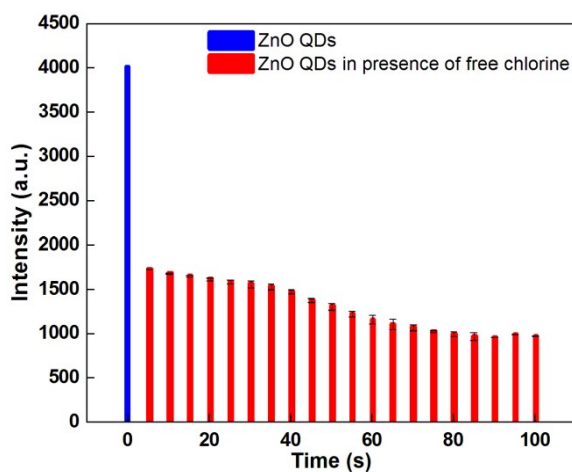

Figure S2 Intensity of ZnO QDs (blue) and intensity of ZnO QDs in presence of free chlorine (red) (n=3)
